# Supplementary material for: La6Cd0.75Ga2Q11.5Cl2.5 (Q = S and Se): two new nonlinear optical chalcohalides with a large laser-induced damage threshold
Source: Royal Society of Chemistry journal article supplement (doi:10.1039/d0ce01852j), 2021-01-01
Supplement: d0ce01852j1.pdf [file d0ce01852j1.pdf]

## Supporting Information for

# La<sub>6</sub>Cd<sub>0.75</sub>Ga<sub>2</sub>Q<sub>11.5</sub>Cl<sub>2.5</sub> (Q = S and Se): Two New Nonlinear Optical Chalcogenides with Large Laser- Induced Damage Threshold (LIDT)

*Feng Lin,<sup>†‡</sup> Mengjia Luo,<sup>†‡</sup> Ruiqi Wang,<sup>§</sup> Xiangli Che,<sup>†¶\*</sup> and Fuqiang Huang<sup>†‡,§¶\*</sup>*

<sup>†</sup>State Key Laboratory of High Performance Ceramics and Superfine Microstructure, Shanghai Institute of Ceramics, Chinese Academy of Sciences, Shanghai 200050, China

<sup>‡</sup>Center of Materials Science and Optoelectronics Engineering, University of Chinese Academy of Sciences, Beijing 100049, China

<sup>§</sup>State Key Laboratory of Rare Earth Materials Chemistry and Applications, Beijing National Laboratory for Molecular Sciences, College of Chemistry and Molecular Engineering, Peking University, Beijing 100871, China

<sup>¶</sup>CAS Center for Excellence in Superconducting Electronic (CENSE), Shanghai 200050, China



## Supporting Tables and Figures

**Table S1.** Crystallographic Data and Experimental Details.

| Formula                                      | $\text{La}_6\text{Cd}_{0.75}\text{Ga}_2\text{S}_{11.5}\text{Cl}_{2.5}$ | $\text{La}_6\text{Cd}_{0.75}\text{Ga}_2\text{S}_{11.5}\text{Cl}_{2.5}$ |
|----------------------------------------------|------------------------------------------------------------------------|------------------------------------------------------------------------|
| Formula weight                               | 1514.46                                                                | 2053.81                                                                |
| Temperature (K)                              | 300                                                                    | 300                                                                    |
| Wavelength (Å)                               | 0.71073                                                                | 0.71073                                                                |
| Crystal system                               | Hexagonal                                                              | Hexagonal                                                              |
| Space group                                  | $P6_3$                                                                 | $P6_3$                                                                 |
| Unit cell dimensions (Å)                     | $a=b=10.1788(3)$<br>$c=6.0633(2)$                                      | $a=b=10.4394(3)$<br>$c=6.4132(2)$                                      |
| Volume (Å <sup>3</sup> )                     | 544.0(4)                                                               | 605.2(8)                                                               |
| $\rho_{\text{(calc.)}}$ (g/cm <sup>3</sup> ) | 4.621                                                                  | 5.65                                                                   |
| $Z$                                          | 1                                                                      | 1                                                                      |
| $F(000)$                                     | 666                                                                    | 876                                                                    |
| Theta range for data collection(°)           | 2.31 to 30.47                                                          | 2.25 to 25.16                                                          |
| Crystal size (mm)                            | 0.04×0.03×0.025                                                        | 0.05×0.03×0.03                                                         |
| Limiting indices                             | $-14 \leq h \leq 14, -14 \leq k \leq 13,$<br>$-8 \leq l \leq 8$        | $-12 \leq h \leq 12, -12 \leq k \leq 12,$<br>$-7 \leq l \leq 6$        |
| Independent refl.                            | $R_{\text{int}}=0.033$                                                 | $R_{\text{int}}=0.030$                                                 |
| Completeness to                              | 100%                                                                   | 100%                                                                   |
| Goodness-of-fit                              | 1.121                                                                  | 1.168                                                                  |
| R indices [all data]                         | $R_1=0.0182$<br>$wR_2=0.0352$                                          | $R_1=0.0200$<br>$wR_2=0.0459$                                          |
| Final R indices [ $>2\sigma(I)$ ]            | $R_1=0.0165$<br>$wR_2=0.0348$                                          | $R_1=0.0194$<br>$wR_2=0.0458$                                          |
| Extinction coeff.                            | 0.009557                                                               | 0.003153                                                               |

|                                                              |                    |                    |
|--------------------------------------------------------------|--------------------|--------------------|
| Largest diff. peak and hole<br>( $e \cdot \text{\AA}^{-3}$ ) | 0.945 and $-1.176$ | 1.296 and $-1.142$ |
|--------------------------------------------------------------|--------------------|--------------------|

**Table S2.** Atomic coordinates equivalent isotropic displacement parameters for

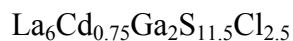

| Atoms | <i>Wyck.</i> | <i>x</i>  | <i>y</i>   | <i>z</i>  | S.O.F. | $U_{\text{eq}}$ ( $\text{\AA}^2$ ) |
|-------|--------------|-----------|------------|-----------|--------|------------------------------------|
| La1   | 6 <i>c</i>   | 0.7683(2) | 0.1419(0)  | 0.8911(1) | 1      | 0.017(3)                           |
| Cd1   | 2 <i>a</i>   | 0         | 0          | 0.6457(1) | 0.373  | 0.060(5)                           |
| Ga1   | 2 <i>b</i>   | 2/3       | 1/3        | 0.4708(9) | 0.875  | 0.011(7)                           |
| Ga2   | 6 <i>c</i>   | 0.7203(1) | 0.2498(1)  | 0.4182(0) | 0.042  | 0.011(7)                           |
| S1    | 2 <i>b</i>   | 2/3       | 1/3        | 0.1025(4) | 1      | 0.011(6)                           |
| S2    | 6 <i>c</i>   | 0.5190(3) | 0.0968(5)  | 0.6202(2) | 0.875  | 0.014(8)                           |
| Cl2   | 6 <i>c</i>   | 0.5190(3) | 0.0968(5)  | 0.6202(2) | 0.125  | 0.014(8)                           |
| S3    | 6 <i>c</i>   | 0.7507(9) | -0.1527(5) | 0.8563(4) | 0.78   | 0.025(8)                           |
| Cl3   | 6 <i>c</i>   | 0.7507(9) | -0.1527(5) | 0.8563(4) | 0.22   | 0.025(8)                           |

**Table S3.** Selected bond length  $\text{La}_6\text{Cd}_{0.75}\text{Ga}_2\text{S}_{11.5}\text{Cl}_{2.5}$

| Bond   | Bond lengths ( $\text{\AA}$ ) | Bond   | Bond lengths ( $\text{\AA}$ ) |
|--------|-------------------------------|--------|-------------------------------|
| La1-S1 | 2.9201                        | Cd1-S3 | 2.5573                        |
| La1-S2 | 2.8606                        | Ga1-S1 | 2.2342                        |
| La1-S2 | 2.9672                        | Ga1-S2 | 2.2924                        |
| La1-S2 | 3.0469                        | Ga2-S1 | 2.2671                        |
| La1-S3 | 2.9217                        | Ga2-S2 | 2.1881                        |
| La1-S3 | 2.9572                        | Ga2-S2 | 2.2221                        |
| La1-S3 | 3.0310                        | Ga2-S3 | 2.5021                        |

**Table S4.** Atomic coordinates equivalent isotropic displacement parameters for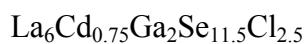

| Atoms | <i>Wyck.</i> | <i>x</i>  | <i>y</i>  | <i>z</i>  | S.O.F. | $U_{\text{eq}}$ (Å <sup>2</sup> ) |
|-------|--------------|-----------|-----------|-----------|--------|-----------------------------------|
| La1   | 6 <i>c</i>   | 0.2193(5) | 0.8461(4) | 0.1065(8) | 1      | 0.025(5)                          |
| Cd1   | 2 <i>a</i>   | 0         | 0         | 0.3486(1) | 0.376  | 0.057(2)                          |
| Ga1   | 2 <i>b</i>   | 1/3       | 2/3       | 0.5240(4) | 0.883  | 0.018(3)                          |
| Ga2   | 6 <i>c</i>   | 0.7203(1) | 0.2498(1) | 0.4182(0) | 0.039  | 0.018(3)                          |
| Se1   | 2 <i>b</i>   | 1/3       | 2/3       | 0.8930(3) | 1      | 0.015(5)                          |
| Se2   | 6 <i>c</i>   | 0.4777(3) | 0.9120(3) | 0.3782(2) | 0.883  | 0.018(4)                          |
| Cl2   | 6 <i>c</i>   | 0.4777(3) | 0.9120(3) | 0.3782(2) | 0.117  | 0.018(4)                          |
| Se3   | 6 <i>c</i>   | 0.2537(3) | 0.1475(7) | 0.1507(3) | 0.729  | 0.032(6)                          |
| Cl3   | 6 <i>c</i>   | 0.2537(3) | 0.1475(7) | 0.1507(3) | 0.271  | 0.032(6)                          |

**Table S5.** Selected bond length for  $\text{La}_6\text{Cd}_{0.75}\text{Ga}_2\text{Se}_{11.5}\text{Cl}_{2.5}$ 

| Bond    | Bond lengths (Å) | Bond    | Bond lengths (Å) |
|---------|------------------|---------|------------------|
| La1-Se1 | 3.0054           | Cd1-Se3 | 2.6306           |
| La1-Se2 | 3.0777           | Ga1-Se1 | 2.3663           |
| La1-Se2 | 3.2457           | Ga1-Se2 | 2.4178           |
| La1-Se2 | 2.9881           | Ga2-Se1 | 2.394            |
| La1-Se3 | 2.9970           | Ga2-Se2 | 2.334            |
| La1-Se3 | 3.0285           | Ga2-Se2 | 2.394            |
| La1-Se3 | 3.1192           | Ga2-Se3 | 2.423            |

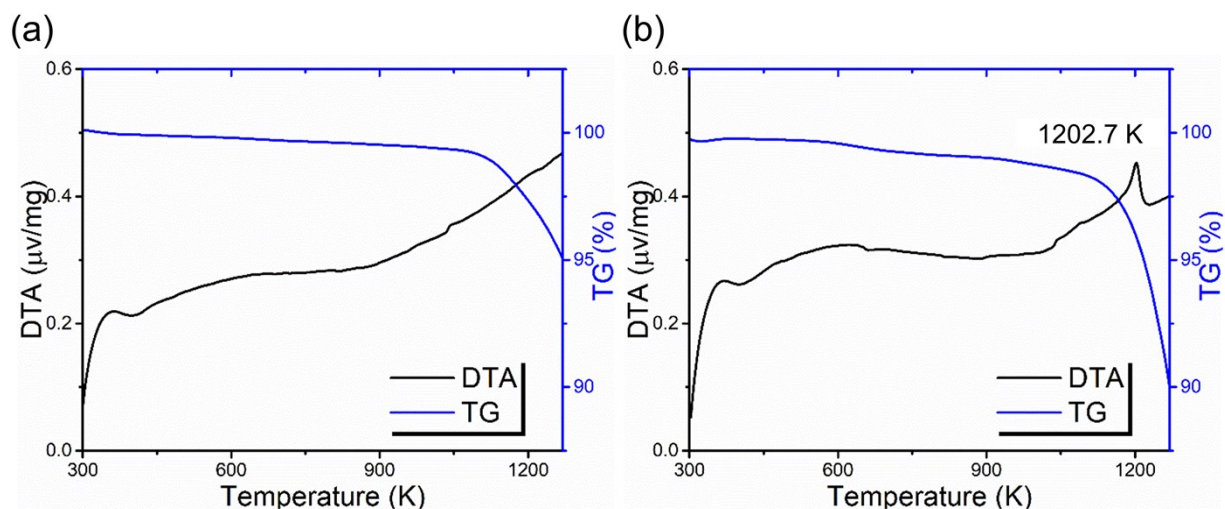

**Figure S1.** Thermal analysis results for (a)  $\text{La}_6\text{Cd}_{0.75}\text{Ga}_2\text{S}_{11.5}\text{Cl}_{2.5}$ , and (b)  $\text{La}_6\text{Cd}_{0.75}\text{Ga}_2\text{Se}_{11.5}\text{Cl}_{2.5}$

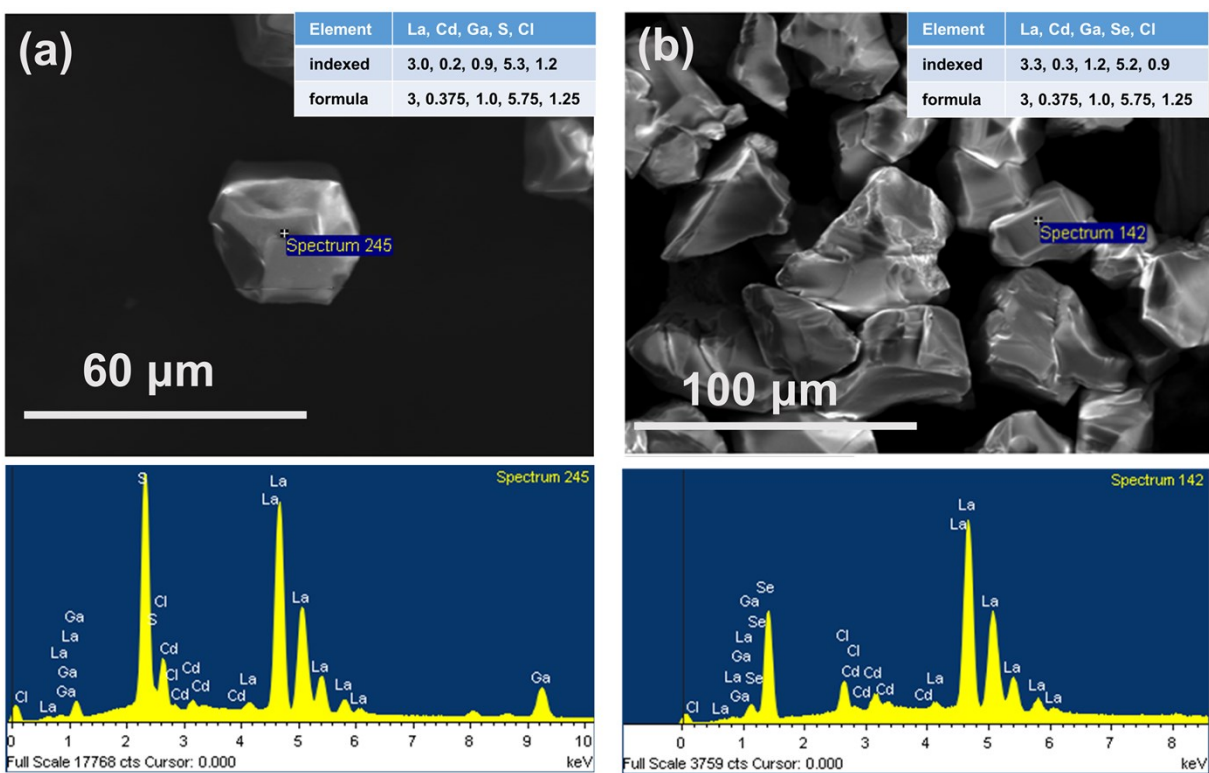

**Figure S2.** SEM and EDS results for (a)  $\text{La}_6\text{Cd}_{0.75}\text{Ga}_2\text{S}_{11.5}\text{Cl}_{2.5}$ , and (b)  $\text{La}_6\text{Cd}_{0.75}\text{Ga}_2\text{Se}_{11.5}\text{Cl}_{2.5}$

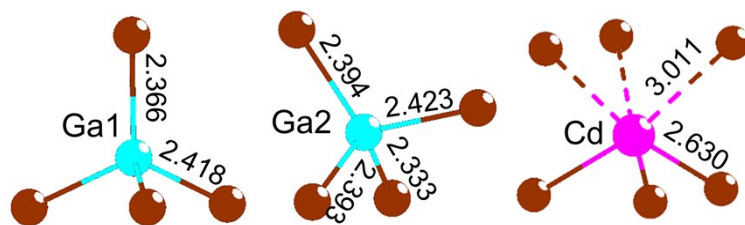

**Figure S3.** Bond length of each polyhedron in  $\text{La}_6\text{Cd}_{0.75}\text{Ga}_2\text{Se}_{11.5}\text{Cl}_{2.5}$
